# Supplementary material
Source: PubMed Central journal article supplement (PMC2430896)

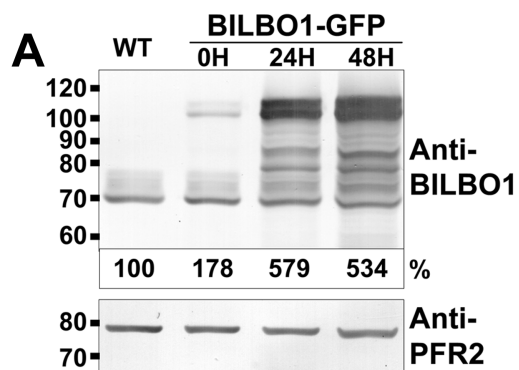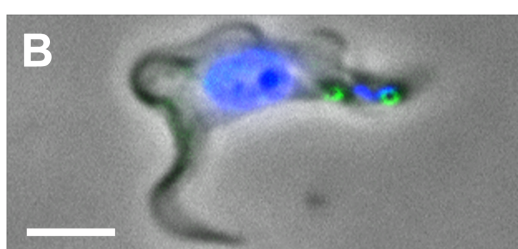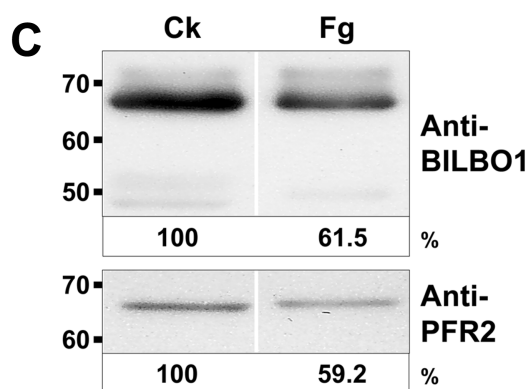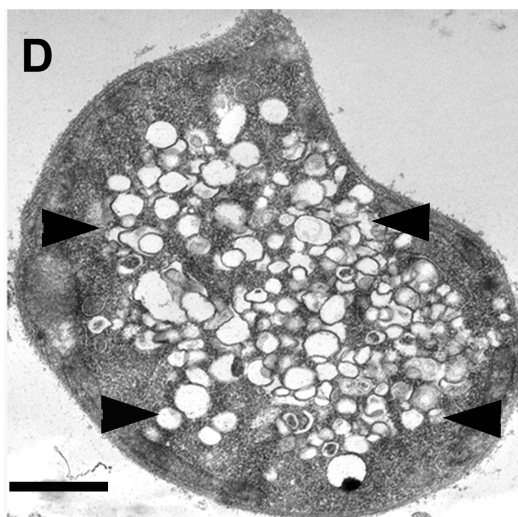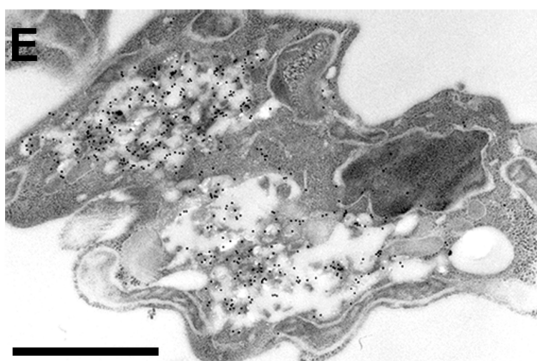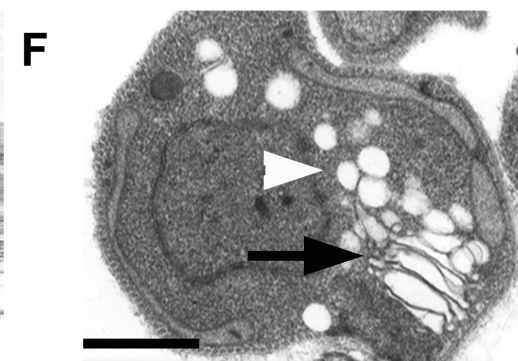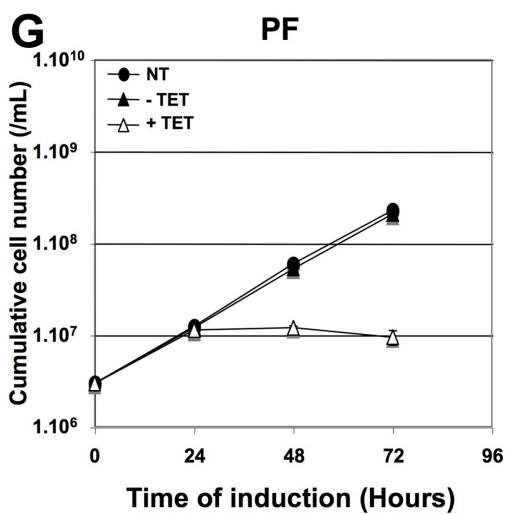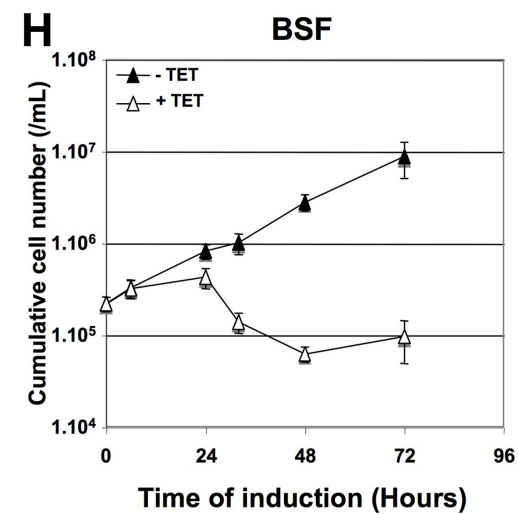

Supplement: pbio.0060105.sg001.pdf [file pbio.0060105.sg001.pdf]

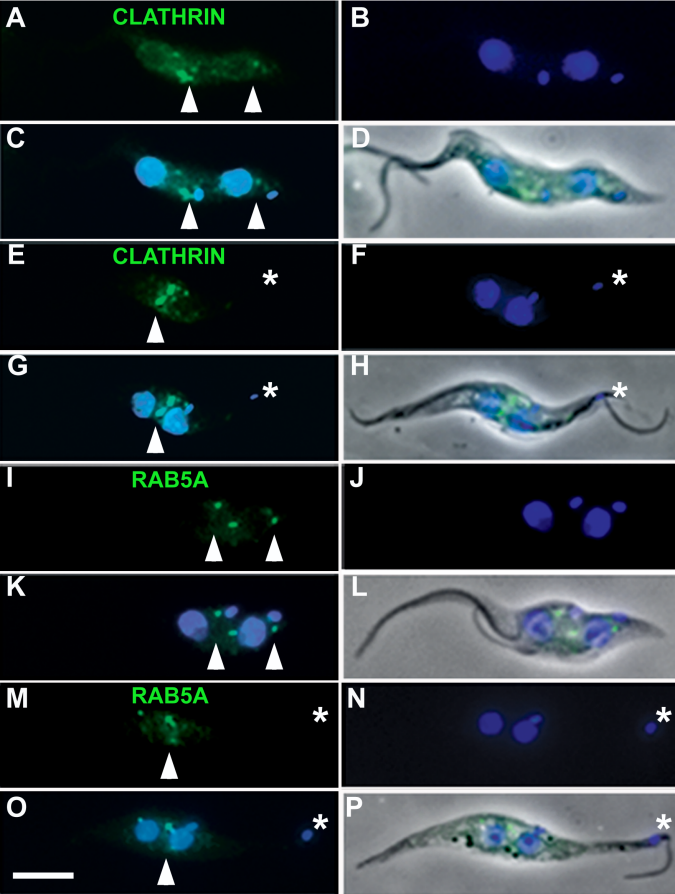

Supplement: pbio.0060105.sg002.pdf [file pbio.0060105.sg002.pdf]

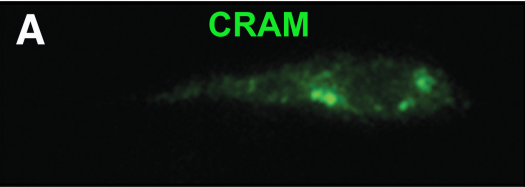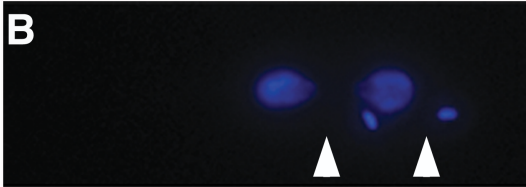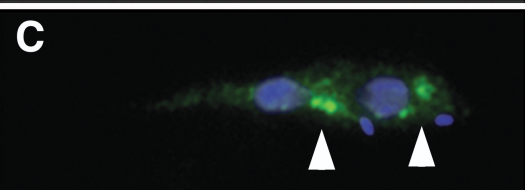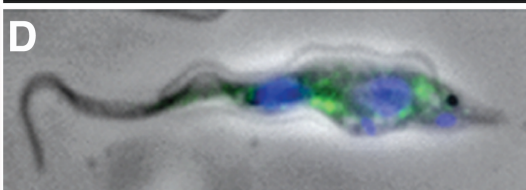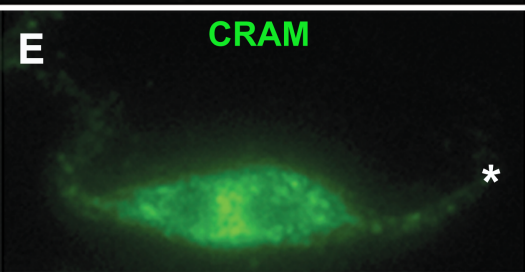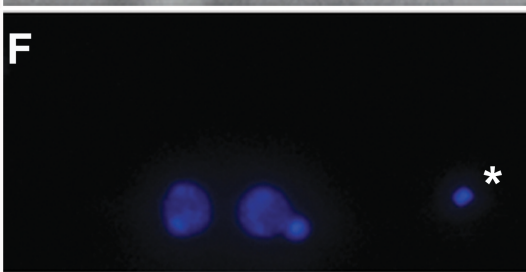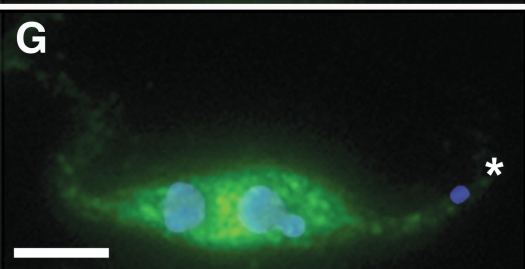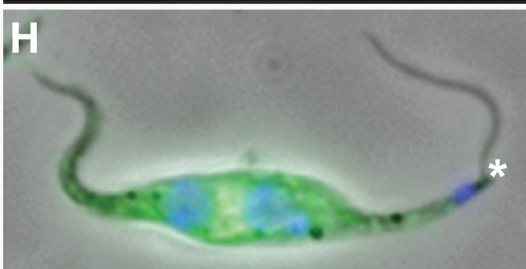

Supplement: pbio.0060105.sg003.pdf [file pbio.0060105.sg003.pdf]

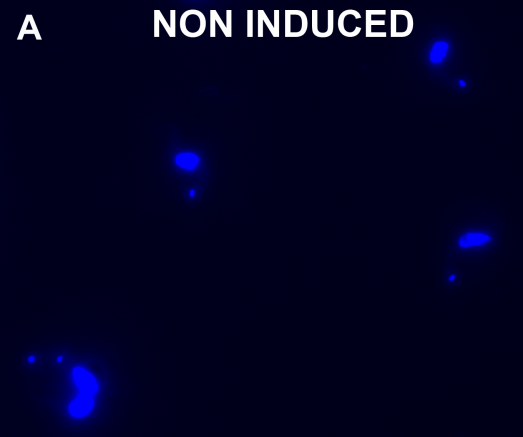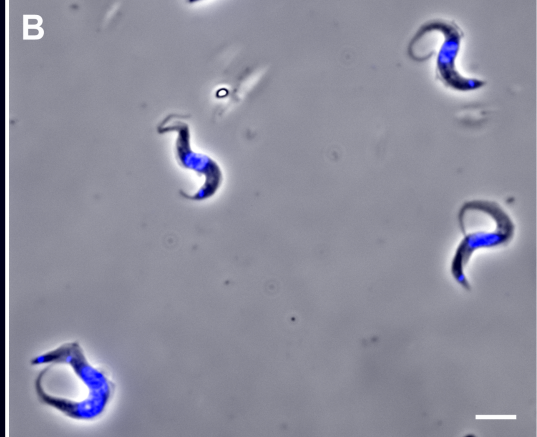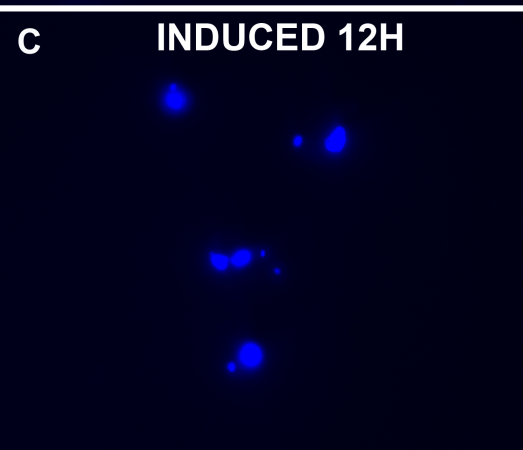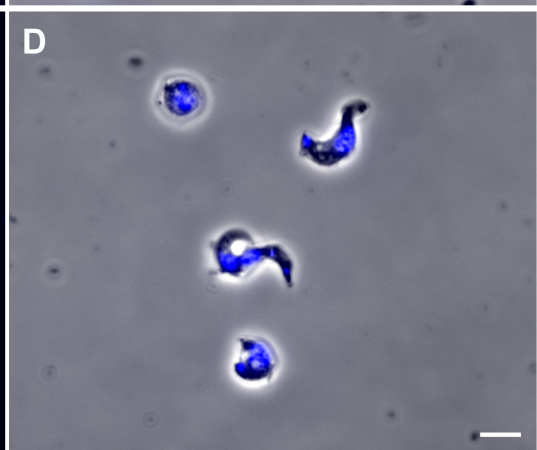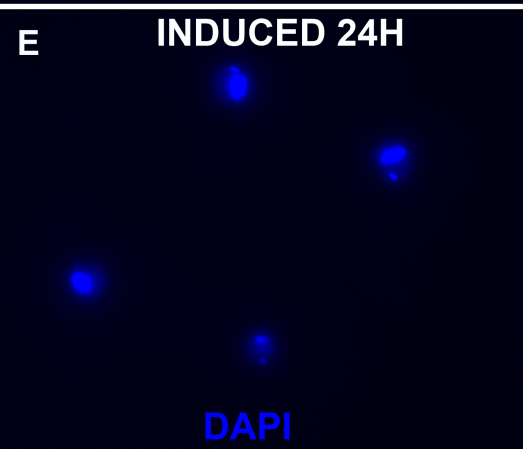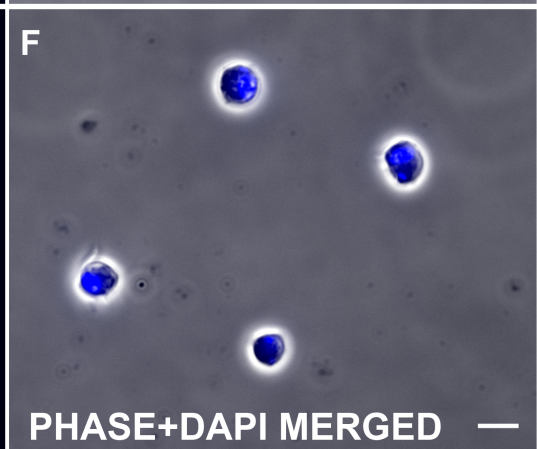

Supplement: pbio.0060105.sg005.pdf [file pbio.0060105.sg005.pdf]
